# Supplementary material for: RBD-Protein/Peptide Vaccine UB-612 Elicits Mucosal and Fc-Mediated Antibody Responses against SARS-CoV-2 in Cynomolgus Macaques
Source: MDPI journal article supplement (doi:10.3390/vaccines12010040), 2023-12-29

Supplemental Figure S1. Antibody-dependent monocyte phagocytosis (ADMP) in UB-612 immunized macaques

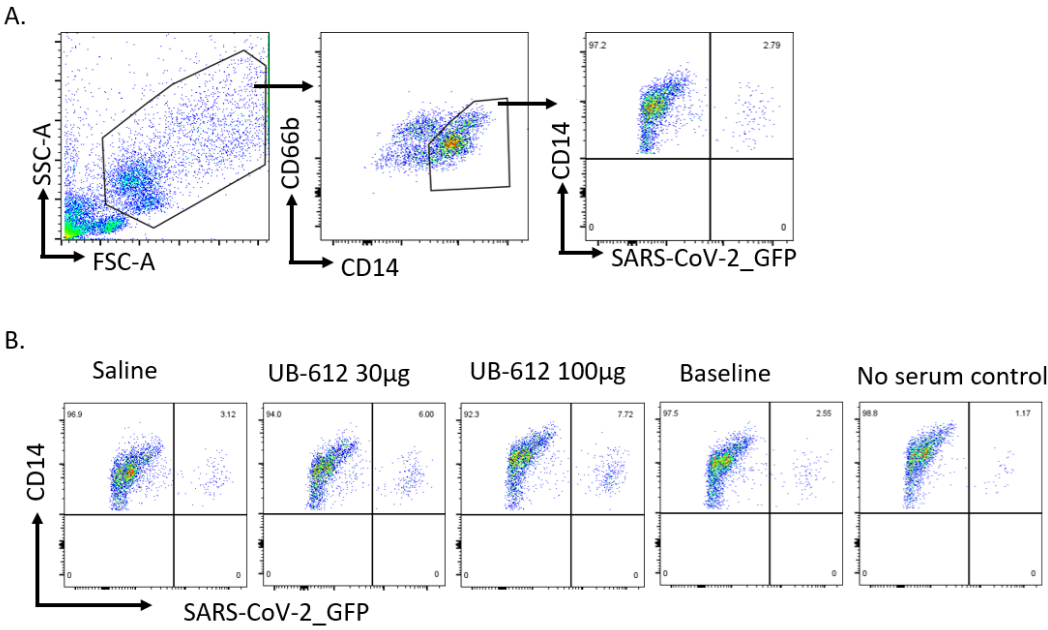

Supplemental Figure S2. ADNKA (A)

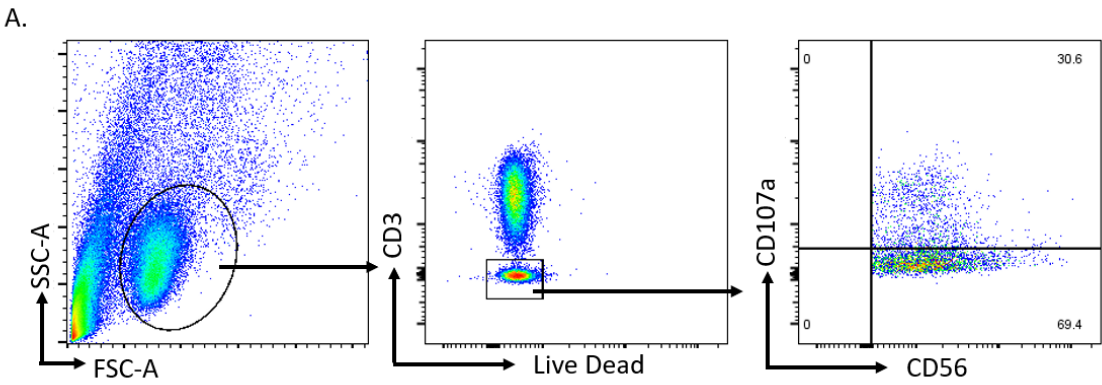

Supplemental Figure S2. ADNKA (B)

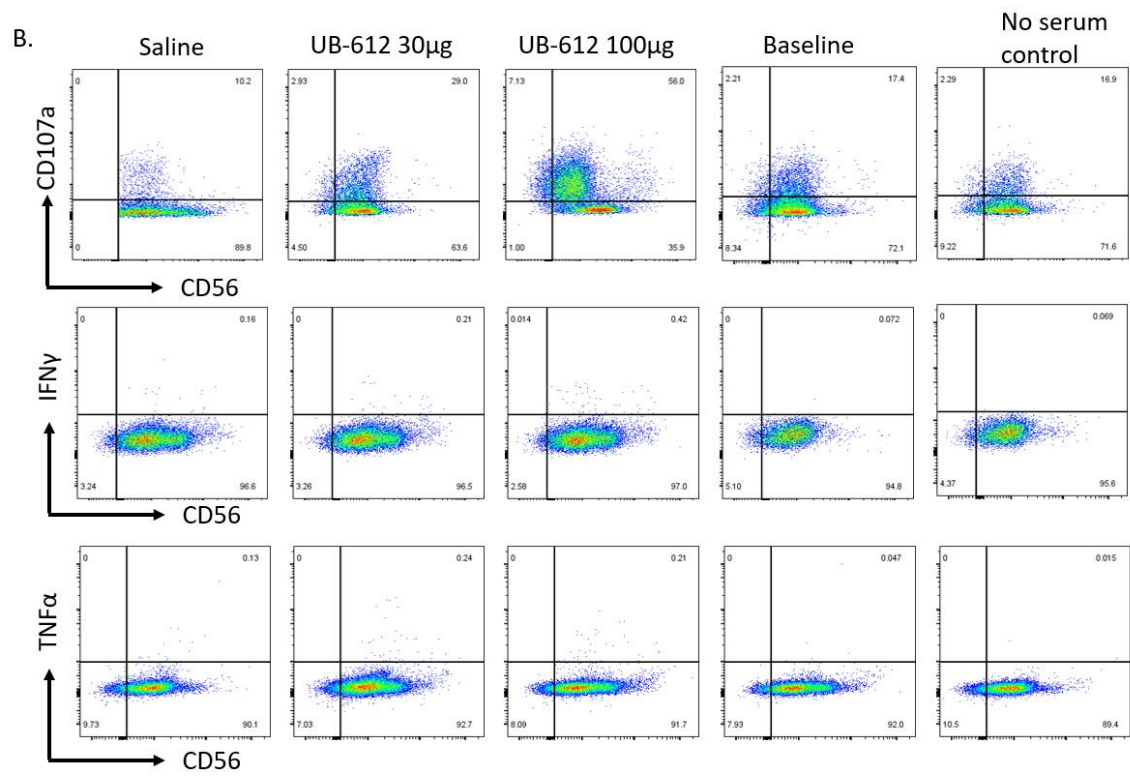

Supplement: s1 [file s1]
